# Supplementary material for: Growth and reproduction of laboratory-reared neanurid Collembola using a novel slime mould diet
Source: PubMed Central journal article supplement (PMC4495557; doi:10.1038/srep11957), 2015-07-08
Supplement: srep11957-s1.pdf [file srep11957-s1.pdf]

# **Growth and reproduction of laboratory-reared neanurid Collembola using a novel slime mould diet**

Jessica L. Hoskins, Charlene Janion-Scheepers, Steven L. Chown, and Grant A. Duffy\*

## **Supplementary Information**

### **Rearing methods for additional species listed in Table 1**

In addition to *N. muscorum*, we collected other neanurid Collembola species (Table S1) from wet eucalypt forest sites in Victoria, New South Wales, and Queensland, Australia. The leaf litter extraction methods described in the main text were used to extract Collembola and create initial stocks. For each species, initial stock sizes were typically between 20 and 50 individuals. These species were given a combined diet of slime mould and bark from *Platanus* sp. trees. All populations were maintained in temperature-controlled rooms set at 15 °C on a 12:12 hour light:dark photoperiod. Populations were regularly checked for eggs and the development time of eggs and number of generations was monitored.

**Supplementary Video 1:** Montage of videos and photographs of a selection of neanurid species successfully reared in the laboratory using a combined bark and slime mould diet.

Table S1: Taxonomic and sample collection data for Neanuridae species that have been successfully reared on a diet of slime mould and algae-covered bark using the methods recommended in Hoskins et al.. Latest generations (Gen.) as of February 2015. All lines are ongoing.

| Subfamily        | Tribe       | Genus                   | Species              | Gen. | Locale                              | Lat. (°) | Lon. (°) | Elevation (m) | Collection date |
|------------------|-------------|-------------------------|----------------------|------|-------------------------------------|----------|----------|---------------|-----------------|
| Neanurinae       | Neanurini   | <i>Neanura</i>          | <i>muscorum</i>      | F4   | Monash University, Clayton, VIC     | -37.9119 | 145.1317 | 101           | 10-Oct-13       |
| Neanurinae       | Paleonurini | ? <i>Australonura</i>   | sp.                  | F3   | Mission Beach, QLD                  | -17.8591 | 146.0619 | 67            | 17-Jul-14       |
| Neanurinae       | Paleonurini | Unknown                 | sp. 1                | F2   | Conway National Park, QLD           | -20.2872 | 148.7640 | 19            | 19-Jul-14       |
| Pseudachorutinae | -           | <i>Anurida</i>          | c.f. <i>granaria</i> | F2   | Jock Marshall Reserve, Clayton, VIC | -37.9103 | 145.1406 | 83            | 22-Jan-14       |
| Pseudachorutinae | -           | ? <i>Pseudachorutes</i> | sp.                  | F2   | Eungella National Park, QLD         | -21.1683 | 148.5069 | 719           | 04-Jun-14       |
| Neanurinae       | Lobellini   | Unknown                 | sp. 2                | F2   | Cotton-Bimbang National Park, NSW   | -31.4937 | 152.6596 | 64            | 04-Jun-14       |
| Neanurinae       | Lobellini   | Unknown                 | sp. 3                | F2   | Wooroonoonan National Parks, QLD    | -17.6700 | 145.7280 | 602           | 14-Jul-14       |
